# Supplementary material for: Ectopic expression of the Sesuvium portulacastrum genes SpHDZ39 and SpHDZ41 enhances cadmium tolerance in Arabidopsis
Source: Research Square preprint supplement (doi:10.21203/rs.3.rs-8285582/v1), 2025-12-11
Supplement: Supplementary file 1 [file 03477b2bdb1fe08b72afb373.xlsx]

## Sheet: Sheet1
Gene	CK 1	CK 2	CK 3	0.2M 1	0.2M 2	0.2M 3	0.4M 1	0.4M 2	0.4M 3	0.6M 1	0.6M 2	0.6M 3	0.8M 1	0.8M 2	0.8M 3	1M 1	1M 2	1M 3
SpHDZ1	11.04	9.44	9.51	22.73	24.71	25.77	12.01	14.59	13.88	13.39	13.59	16.21	48.45	47.25	47.26	49.11	62.79	63.7
SpHDZ2	105.59	108.77	123.5	142.78	142.81	139.83	142.29	141.13	141.4	78.38	78.04	85.9	65.61	70.53	67.97	17.67	18.04	21.87
SpHDZ3	0	0	0.03	0.09	0.08	0.15	0.31	0.12	0	0.18	0.14	0.26	0.08	0.03	0.08	0	0	0
SpHDZ4	1.74	1.27	1.54	0.91	1.08	1.12	2.71	2.5	2.62	2.74	2.93	2.74	2.18	1.88	1.66	0.75	0.91	1.02
SpHDZ5	14.45	14.28	15.62	12.06	11.47	12.17	12.01	11.54	12.94	11.24	13.18	12.5	8.63	8.42	8.54	1.73	2.49	2.38
SpHDZ6	3.09	3.36	2.29	3.73	3.71	4.91	3.41	3.37	3.55	3.46	3.13	4.4	19.09	18.31	19.13	61.9	56.78	61.78
SpHDZ7	8.04	9.9	8	16.41	16.55	16.88	15.92	15.49	15.21	26.67	24.99	26.08	89.46	89.91	91.39	193.87	195.77	208.36
SpHDZ8	2.42	2.92	3.21	6.84	6.4	6.2	7.63	6.13	7.16	7.86	9.26	8.47	42.21	43.09	39.67	219.16	207.44	212.65
SpHDZ9	1.09	1.23	1.01	1.46	1.52	1.11	0.93	0.94	0.64	1.65	1.64	1.67	0.97	0.77	0.75	0.39	0.14	0.15
SpHDZ10	5.81	4.44	4.56	4	4.17	3.73	4.72	4.48	3.92	5.23	5.26	4.41	4.53	5.42	5.31	12.62	8.58	11.53
SpHDZ11	0.11	0.31	0.22	0.9	0.9	1.08	0.66	0.66	0.5	1.49	1.55	1.51	0.79	0.36	0.67	0.04	0	0.04
SpHDZ12	0	0	0	0.05	0	0	0	0	0	0	0.15	0	0	0	0.07	0.06	0	0.06
SpHDZ13	0	0	0	0	0	0	0	0	0	0	0	0.05	0	0	0	0	0	0
SpHDZ14	12.63	12.49	14.39	14.05	13.99	12.31	13.27	12.31	13.44	16.43	16.64	19.27	26.62	27.54	29	43.27	42.96	43.85
SpHDZ15	1.41	1.61	1.77	0.77	0.77	0.74	2.3	1.74	1.8	2.56	1.93	2.76	0.86	1.54	1.46	0.08	0.68	0.17
SpHDZ16	2.25	2.72	2.93	1.98	2.04	2.49	1.85	2.14	1.97	1.47	1.41	1.86	0.94	0.93	0.96	0.29	0.5	0.46
SpHDZ17	1.68	2.29	1.83	1.41	1.64	1.7	3.52	2.75	3.11	5.66	5.46	5.76	6.02	5.37	5.61	1.04	1.3	0.89
SpHDZ18	0.95	0.72	1.08	0.9	0.96	0.78	1.51	1.22	1.78	1.38	2.06	1.5	1.11	0.99	1.28	0.5	0.59	0.28
SpHDZ19	6.34	5.71	7.42	7.37	8.24	7.42	8.8	8.67	8.2	13.93	15.08	13.32	12.87	13.8	12.61	3.57	4.41	3.89
SpHDZ20	61.59	61.65	72.02	63.93	62.21	63.26	64.04	61.11	63.08	52.86	52.67	65.19	53	54.88	55.33	27.75	27.13	32.42
SpHDZ21	0.35	0.4	0.09	0.75	0.55	0.52	0.89	0.65	0.89	0.84	1.03	1.1	0.5	0.17	0.62	0	0	0.04
SpHDZ22	4.48	4.72	4.25	3.21	2.92	3.08	3.5	3.6	4.37	3.3	3.7	3.66	1.57	1.7	1.45	0.43	0.49	0.72
SpHDZ23	133.68	125.47	136.79	103.09	105.02	104.69	112.98	111.47	110.09	82.41	84.77	83.65	65.02	69.75	66.74	71.17	78.27	83.48
SpHDZ24	6.25	5.05	5.99	5.19	6.66	6.33	7.6	7.51	7.34	8.87	8.06	6	10.86	9.81	11.77	19.83	8.87	9.14
SpHDZ25	3.6	3.02	4.27	3.57	3.58	3.59	6	5.41	4.61	6.07	6.7	6.87	6.22	6.84	6.13	1.89	2.6	3.12
SpHDZ26	1.43	1.82	1.57	1.2	0.93	1.11	0.66	0.63	0.73	0.48	0.83	0.46	4.09	4.58	5.69	35.13	33.66	39.11
SpHDZ27	14.78	15.21	14.57	16.45	14.85	16.09	14.93	14.51	14.4	14	14.46	12.99	13.2	11.73	12.9	4.16	5.92	5.94
SpHDZ28	18.93	19.7	18.44	20.29	18.92	21.31	20.91	19.81	20.52	21.4	19.47	19.41	16.96	15.75	15.31	2.94	3.48	2.81
SpHDZ29	3.18	3.93	3.7	2.77	3.58	3.91	2.58	1.77	2.07	2.33	2.74	1.73	17.19	17.52	16.8	132.28	125.08	143.03
SpHDZ30	0	0	0	0	0.04	0.04	0.04	0.04	0	0.11	0.03	0	0.4	0.14	0.16	0.17	0.2	0.07
SpHDZ31	0.42	0.85	0.68	0.71	0.42	0.52	1.31	1.04	1	1.62	1.15	1.3	1.43	1.04	1.43	0.24	0.59	0.4
SpHDZ32	140.66	143.72	149.39	105.42	110.81	109.23	106.87	103.86	101.5	96.98	94.54	113.8	102.02	115.71	112.43	77.18	102.13	105.15
SpHDZ33	3.45	3.76	3.89	1.99	2.2	2.26	4.97	4.96	4.23	5.84	5.47	5.49	2.92	3.37	3.19	0.76	1.11	0.95
SpHDZ34	0	0.06	0.35	0.1	0.14	0.19	0.46	0.48	0.3	0.54	0.92	0.87	2.99	3.2	3.4	7.14	5.11	6.07
SpHDZ35	7.79	8.58	6.94	8.02	9	8.73	6.22	6.86	6.34	9.79	8.01	8.44	4.78	5.18	5.03	0.66	0.78	0.87
SpHDZ36	0.94	1.51	1.1	1.33	1.14	1.31	1.35	0.73	0.93	1.29	0.82	0.86	0.77	0.58	0.45	0.35	0.66	0.66
SpHDZ37	0.44	0.32	0.15	0.44	0.27	0.35	0.52	0.42	0.24	0.41	0.6	0.38	0.89	0.99	0.88	0.38	0.35	0.4
SpHDZ38	0.04	0.09	0	0.22	0.1	0.1	0.18	0.1	0.09	0.27	0.15	0.28	0.36	0.68	0.35	0.34	0.44	0.34
SpHDZ39	1.97	1.61	2.05	1.61	1.14	1.58	2.15	2.72	2.04	1.72	2.98	2.13	2	2.29	1.39	0.42	0.61	0.81
SpHDZ40	13.56	12.04	16.09	15.3	14.29	14.05	14.04	15.05	13.79	8.42	9.62	9.62	11.33	13.37	13.65	15.52	15.31	17.31
SpHDZ41	1.67	1.83	3.15	4.62	4.12	5.37	3.06	3.58	3.22	5.25	4.14	7.86	32.77	30.69	32.64	127.49	137.08	139.92
SpHDZ42	0	0	0.04	0	0.02	0	0	0	0	0.02	0	0.04	0.01	0	0	0	0	0
SpHDZ43	3.21	3.07	2.22	2.81	3.09	2.55	3.72	3.98	3.45	7.08	6.84	6.11	6.19	5.71	6.61	1.82	1.69	1.79
SpHDZ44	0.76	0.52	0.65	0.68	0.64	0.56	0.69	0.69	0.83	0.47	0.61	0.59	0.21	0.23	0.12	0.06	0	0.06
SpHDZ45	0.94	1.71	1	1.2	1.57	1.89	0.77	1.34	0.72	0.91	1.23	1.42	0.89	0.92	0.78	0.86	0.29	0.95
SpHDZ46	0.05	0	0.14	0.04	0.05	0.1	0	0.05	0.05	0.05	0	0	0.13	0	0	0	0	0.35
