# Supplementary material for: Ectopic expression of the Sesuvium portulacastrum genes SpHDZ39 and SpHDZ41 enhances cadmium tolerance in Arabidopsis
Source: Research Square preprint supplement (doi:10.21203/rs.3.rs-8285582/v1), 2025-12-11
Supplement: Supplementary file 3 [file 2028c175323f34630a7ae3d7.docx]

**Table S1. Analysis of physicochemical properties of *SpHDZ* family members**

| Gene ID | Gene length  (bp) | Protein name | Exon/  intron | Length (aa) | MW (Da) | Isoelectric points | Instability index | Aliphatic index | Grand average of hydropathicity | Predicted subcellular location |
| --- | --- | --- | --- | --- | --- | --- | --- | --- | --- | --- |
| Spor0001840.1 | 855 | SpHDZ1 | 2/1 | 284 | 31016.95 | 8.57 | 53.73 | 69.08 | -0.605 | nucleus |
| Spor0003220.1 | 1005 | SpHDZ2 | 3/2 | 334 | 37387.98 | 5.01 | 63.94 | 59.28 | -0.866 | nucleus |
| Spor0014950.1 | 1098 | SpHDZ3 | 3/2 | 365 | 40759.97 | 5.89 | 50.81 | 57.97 | -0.933 | nucleus |
| Spor0027420.1 | 2559 | SpHDZ4 | 18/2 | 852 | 92786.94 | 6.11 | 47.68 | 85.77 | -0.062 | nucleus |
| Spor0073050.1 | 2517 | SpHDZ5 | 9/2 | 838 | 91036.15 | 6.00 | 51.37 | 78.10 | -0.313 | nucleus |
| Spor0075400.1 | 780 | SpHDZ6 | 2/3 | 259 | 29531.73 | 4.73 | 45.73 | 64.44 | -0.879 | nucleus |
| Spor0084440.1 | 717 | SpHDZ7 | 2/2 | 238 | 27655.67 | 5.76 | 75.89 | 57.39 | -1.125 | nucleus |
| Spor0085850.1 | 717 | SpHDZ8 | 2/2 | 238 | 27594.54 | 5.86 | 70.82 | 57.39 | -1.152 | nucleus |
| Spor0088140.1 | 2253 | SpHDZ9 | 8/2 | 750 | 83206.56 | 5.53 | 51.41 | 80.61 | -0.280 | nucleus |
| Spor0095550.1 | 852 | SpHDZ10 | 4/2 | 283 | 32656.26 | 4.82 | 58.39 | 66.47 | -0.862 | nucleus |
| Spor0120950.1 | 1002 | SpHDZ11 | 3/2 | 333 | 37136.39 | 5.79 | 51.61 | 67.09 | -0.781 | nucleus |
| Spor0151680.1 | 708 | SpHDZ12 | 3/2 | 235 | 27191.73 | 6.36 | 71.66 | 70.89 | -0.705 | nucleus |
| Spor0158660.1 | 792 | SpHDZ13 | 2/2 | 263 | 29046.89 | 8.04 | 58.03 | 73.08 | -0.625 | nucleus |
| Spor0165560.1 | 984 | SpHDZ14 | 2/2 | 327 | 37151.09 | 4.56 | 58.97 | 63.49 | -0.956 | nucleus |
| Spor0165910.1 | 942 | SpHDZ15 | 3/2 | 313 | 34885.83 | 5.88 | 61.57 | 58.37 | -0.829 | nucleus |
| Spor0184680.1 | 2598 | SpHDZ16 | 11/3 | 865 | 94974.01 | 6.06 | 49.15 | 77.45 | -0.397 | nucleus |
| Spor0204270.1 | 2532 | SpHDZ17 | 18/3 | 843 | 92488.87 | 5.66 | 52.43 | 86.69 | -0.103 | cytoplasm |
| Spor0207910.1 | 735 | SpHDZ18 | 2/3 | 244 | 28171.72 | 8.25 | 61.91 | 68.40 | -0.789 | nucleus |
| Spor0224260.1 | 750 | SpHDZ19 | 3/2 | 249 | 27423.74 | 9.07 | 46.54 | 55.70 | -0.866 | nucleus |
| Spor0238180.1 | 1005 | SpHDZ20 | 3/2 | 334 | 37446.02 | 5.00 | 66.39 | 61.02 | -0.839 | nucleus |
| Spor0243560.1 | 1089 | SpHDZ21 | 3/1 | 362 | 40481.62 | 5.85 | 52.3 | 56.85 | -0.956 | nucleus |
| Spor0256220.1 | 2562 | SpHDZ22 | 18/2 | 853 | 92726.80 | 6.07 | 47.77 | 85.91 | -0.058 | chloroplast |
| Spor0259180.1 | 651 | SpHDZ23 | 3/2 | 216 | 24765.33 | 5.49 | 59.71 | 57.78 | -0.978 | nucleus |
| Spor0260120.1 | 777 | SpHDZ24 | 3/2 | 258 | 29678.46 | 6.62 | 59.49 | 70.78 | -0.788 | nucleus |
| Spor0292710.1 | 1149 | SpHDZ25 | 4/2 | 382 | 41386.31 | 9.00 | 55.41 | 57.25 | -0.778 | nucleus |
| Spor0311920.1 | 792 | SpHDZ26 | 2/2 | 263 | 29887.97 | 4.68 | 43.50 | 63.50 | -0.897 | nucleus |
| Spor0314320.1 | 2496 | SpHDZ27 | 9/2 | 831 | 90252.41 | 6.00 | 50.97 | 79.33 | -0.285 | nucleus |
| Spor0336210.1 | 2502 | SpHDZ28 | 9/2 | 833 | 90580.80 | 5.97 | 51.49 | 79.14 | -0.305 | nucleus |
| Spor0338580.1 | 780 | SpHDZ29 | 2/5 | 259 | 29442.50 | 4.76 | 44.76 | 62.20 | -0.894 | nucleus |
| Spor0370140.1 | 783 | SpHDZ30 | 2/2 | 260 | 29021.80 | 7.57 | 54.20 | 75.42 | -0.643 | nucleus |
| Spor0374140.1 | 924 | SpHDZ31 | 3/3 | 307 | 34276.29 | 6.01 | 61.66 | 59.87 | -0.813 | nucleus |
| Spor0388560.1 | 993 | SpHDZ32 | 3/2 | 330 | 37556.91 | 4.79 | 63.21 | 60.55 | -0.900 | nucleus |
| Spor0392140.1 | 2565 | SpHDZ33 | 18/2 | 854 | 92898.04 | 6.03 | 48.75 | 85.23 | -0.071 | chloroplast |
| Spor0398220.1 | 648 | SpHDZ34 | 3/2 | 215 | 24651.80 | 7.67 | 56.98 | 67.58 | -0.879 | nucleus |
| Spor0400230.1 | 2532 | SpHDZ35 | 19/2 | 843 | 92532.90 | 5.66 | 53.13 | 86.57 | -0.104 | cytoplasm |
| Spor0413760.1 | 2565 | SpHDZ36 | 11/4 | 854 | 94243.36 | 6.16 | 51.21 | 78.69 | -0.403 | nucleus |
| Spor0475200.1 | 2040 | SpHDZ37 | 10/3 | 679 | 76089.61 | 6.73 | 47.69 | 79.65 | -0.444 | nucleus |
| Spor0490750.1 | 792 | SpHDZ38 | 2/1 | 263 | 29310.10 | 7.56 | 53.13 | 70.46 | -0.693 | nucleus |
| Spor0511370.1 | 990 | SpHDZ39 | 3/2 | 329 | 36779.49 | 5.88 | 58.73 | 54.65 | -1.007 | nucleus |
| Spor0511690.1 | 987 | SpHDZ40 | 3/2 | 328 | 37085.99 | 4.53 | 58.00 | 64.79 | -0.898 | nucleus |
| Spor0516400.1 | 714 | SpHDZ41 | 2/1 | 237 | 27510.43 | 6.04 | 71.74 | 56.37 | -1.174 | nucleus |
| Spor0519080.1 | 2253 | SpHDZ42 | 8/2 | 750 | 83122.31 | 5.58 | 47.86 | 79.69 | -0.304 | nucleus |
| Spor0542040.1 | 2532 | SpHDZ43 | 19/2 | 843 | 92483.80 | 5.58 | 53.36 | 86.23 | -0.104 | cytoplasm |
| Spor0561210.1 | 2568 | SpHDZ44 | 11/4 | 855 | 94024.10 | 6.07 | 50.02 | 79.03 | -0.376 | nucleus |
| Spor0572280.1 | 858 | SpHDZ45 | 4/2 | 285 | 32793.32 | 4.84 | 56.05 | 66.00 | -0.902 | nucleus |
| Spor0592860.1 | 768 | SpHDZ46 | 3/2 | 510 | 59266.96 | 7.14 | 61.62 | 68.90 | -0.809 | nucleus |

**Table S2.** **WGD/segmental dumplication event of *SpHDZs***

| Gene name | Gene ID | Duplication type |
| --- | --- | --- |
| *SpHDZ1* | Spor0001840.1 | WGD or Segmental |
| *SpHDZ2* | Spor0003220.1 | WGD or Segmental |
| *SpHDZ3* | Spor0014950.1 | WGD or Segmental |
| *SpHDZ4* | Spor0027420.1 | WGD or Segmental |
| *SpHDZ5* | Spor0073050.1 | WGD or Segmental |
| *SpHDZ6* | Spor0075400.1 | WGD or Segmental |
| *SpHDZ7* | Spor0084440.1 | WGD or Segmental |
| *SpHDZ8* | Spor0085850.1 | WGD or Segmental |
| *SpHDZ9* | Spor0088140.1 | WGD or Segmental |
| *SpHDZ10* | Spor0095550.1 | WGD or Segmental |
| *SpHDZ11* | Spor0120950.1 | WGD or Segmental |
| *SpHDZ12* | Spor0151680.1 | WGD or Segmental |
| *SpHDZ13* | Spor0158660.1 | WGD or Segmental |
| *SpHDZ14* | Spor0165560.1 | WGD or Segmental |
| *SpHDZ15* | Spor0165910.1 | WGD or Segmental |
| *SpHDZ16* | Spor0184680.1 | WGD or Segmental |
| *SpHDZ17* | Spor0204270.1 | WGD or Segmental |
| *SpHDZ18* | Spor0207910.1 | WGD or Segmental |
| *SpHDZ19* | Spor0224260.1 | WGD or Segmental |
| *SpHDZ20* | Spor0238180.1 | WGD or Segmental |
| *SpHDZ21* | Spor0243560.1 | WGD or Segmental |
| *SpHDZ22* | Spor0256220.1 | WGD or Segmental |
| *SpHDZ23* | Spor0259180.1 | WGD or Segmental |
| *SpHDZ24* | Spor0260120.1 | WGD or Segmental |
| *SpHDZ25* | Spor0292710.1 | WGD or Segmental |
| *SpHDZ26* | Spor0311920.1 | WGD or Segmental |
| *SpHDZ27* | Spor0314320.1 | WGD or Segmental |
| *SpHDZ28* | Spor0336210.1 | WGD or Segmental |
| *SpHDZ29* | Spor0338580.1 | WGD or Segmental |
| *SpHDZ30* | Spor0370140.1 | WGD or Segmental |
| *SpHDZ31* | Spor0374140.1 | WGD or Segmental |
| *SpHDZ32* | Spor0388560.1 | WGD or Segmental |
| *SpHDZ33* | Spor0392140.1 | WGD or Segmental |
| *SpHDZ34* | Spor0398220.1 | WGD or Segmental |
| *SpHDZ35* | Spor0400230.1 | WGD or Segmental |
| *SpHDZ36* | Spor0413760.1 | WGD or Segmental |
| *SpHDZ37* | Spor0475200.1 | WGD or Segmental |
| *SpHDZ38* | Spor0490750.1 | WGD or Segmental |
| *SpHDZ39* | Spor0511370.1 | WGD or Segmental |
| *SpHDZ40* | Spor0511690.1 | WGD or Segmental |
| *SpHDZ41* | Spor0516400.1 | WGD or Segmental |
| *SpHDZ42* | Spor0519080.1 | WGD or Segmental |
| *SpHDZ43* | Spor0542040.1 | WGD or Segmental |
| *SpHDZ44* | Spor0561210.1 | WGD or Segmental |
| *SpHDZ45* | Spor0572280.1 | WGD or Segmental |
| *SpHDZ46* | Spor0592860.1 | WGD or Segmental |

**Table S3. Ka, Ks, and Ka/Ks values for the homologous gene pair gene1 and gene2 in *SpHDZs***

| Gene1 | Gene2 | Ka | Ks | Ka/Ks |
| --- | --- | --- | --- | --- |
| *SpHDZ2* | *SpHDZ20* | 0.008932 | 0.033498 | 0.266654 |
| *SpHDZ3* | *SpHDZ11* | 0.025490 | 0.130237 | 0.195717 |
| *SpHDZ3* | *SpHDZ15* | 0.320874 | 1.506143 | 0.213043 |
| *SpHDZ3* | *SpHDZ21* | 0.005834 | 0.059940 | 0.097337 |
| *SpHDZ3* | *SpHDZ39* | 0.360863 | 1.443587 | 0.249977 |
| *SpHDZ4* | *SpHDZ22* | 0.004138 | 0.028064 | 0.147435 |
| *SpHDZ7* | *SpHDZ8* | 0.015829 | 0.014484 | 1.092854 |
| *SpHDZ7* | *SpHDZ41* | 0.024851 | 0.037067 | 0.670417 |
| *SpHDZ8* | *SpHDZ41* | 0.019470 | 0.021953 | 0.886909 |
| *SpHDZ9* | *SpHDZ42* | 0.016627 | 0.059367 | 0.280068 |
| *SpHDZ10* | *SpHDZ45* | 0.022833 | 0.081160 | 0.281330 |
| *SpHDZ11* | *SpHDZ15* | 0.336659 | 1.562072 | 0.215521 |
| *SpHDZ11* | *SpHDZ39* | 0.366450 | 1.763189 | 0.207834 |
| *SpHDZ13* | *SpHDZ38* | 0.019863 | 0.028822 | 0.689169 |
| *SpHDZ14* | *SpHDZ40* | 0.011672 | 0.055982 | 0.208498 |
| *SpHDZ15* | *SpHDZ39* | 0.002746 | 0.085846 | 0.031984 |
| *SpHDZ16* | *SpHDZ36* | 0.012376 | 0.094833 | 0.130499 |
| *SpHDZ16* | *SpHDZ44* | 0.006886 | 0.038774 | 0.177587 |
| *SpHDZ17* | *SpHDZ35* | 0.005214 | 0.063859 | 0.081649 |
| *SpHDZ17* | *SpHDZ43* | 0.002603 | 0.033813 | 0.076986 |
| *SpHDZ18* | *SpHDZ24* | 0.039178 | 0.081344 | 0.481636 |
| *SpHDZ18* | *SpHDZ46* | 0.026793 | 0.047180 | 0.567879 |
| *SpHDZ21* | *SpHDZ11* | 0.025478 | 0.118809 | 0.214445 |
| *SpHDZ21* | *SpHDZ15* | 0.322840 | 1.514175 | 0.213212 |
| *SpHDZ21* | *SpHDZ39* | 0.355634 | 1.555731 | 0.228596 |
| *SpHDZ25* | *SpHDZ19* | 0.021319 | 0.105273 | 0.202511 |
| *SpHDZ26* | *SpHDZ6* | 0.018266 | 0.086908 | 0.210172 |
| *SpHDZ26* | *SpHDZ29* | 0.016450 | 0.065508 | 0.251118 |
| *SpHDZ27* | *SpHDZ5* | 0.010030 | 0.058862 | 0.170391 |
| *SpHDZ27* | *SpHDZ28* | 0.011629 | 0.066262 | 0.175494 |
| *SpHDZ27* | *SpHDZ42* | 0.331611 | 2.308793 | 0.143630 |
| *SpHDZ28* | *SpHDZ5* | 0.006821 | 0.027886 | 0.244612 |
| *SpHDZ29* | *SpHDZ6* | 0.009863 | 0.058982 | 0.167222 |
| *SpHDZ30* | *SpHDZ13* | 0.023505 | 0.065648 | 0.358045 |
| *SpHDZ30* | *SpHDZ38* | 0.038926 | 0.059912 | 0.649716 |
| *SpHDZ35* | *SpHDZ43* | 0.004690 | 0.063905 | 0.073389 |
| *SpHDZ36* | *SpHDZ44* | 0.016587 | 0.091152 | 0.181974 |
| *SpHDZ42* | *SpHDZ5* | 0.330505 | 2.725318 | 0.121272 |
| *SpHDZ46* | *SpHDZ24* | 0.035535 | 0.072147 | 0.492529 |

**Table S4. Prediction of SpHDZs secondary structure**

| Protein name | Alpha helix (%) | Extended Strand (%) | Random coil (%) | Distribution of secondary structure elements |
| --- | --- | --- | --- | --- |
| SpHDZ1 | 30.63 | 13.73 | 55.63 | 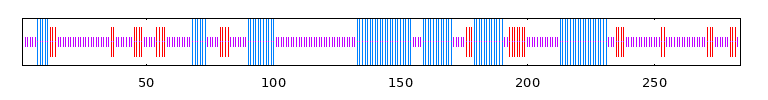 |
| SpHDZ2 | 36.83 | 9.88 | 53.29 | 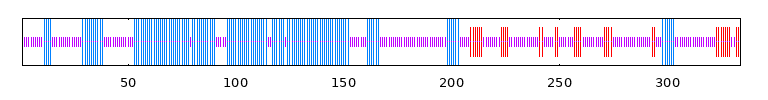 |
| SpHDZ3 | 25.75 | 18.36 | 55.89 | 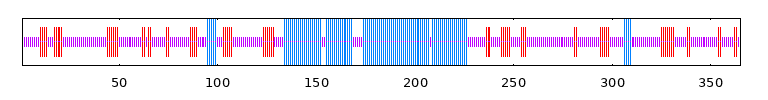 |
| SpHDZ4 | 31.57 | 18.66 | 49.77 | 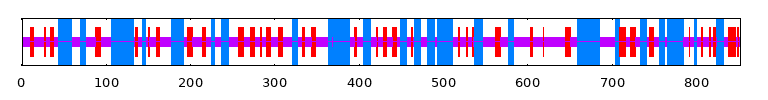 |
| SpHDZ5 | 28.52 | 20.41 | 51.07 | 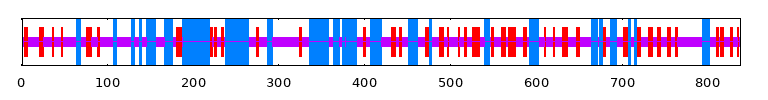 |
| SpHDZ6 | 46.33 | 12.74 | 40.93 | 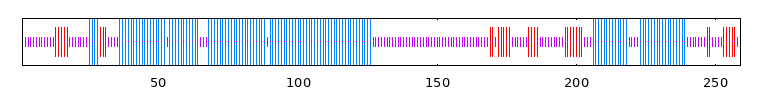 |
| SpHDZ7 | 51.68 | 10.50 | 37.82 | 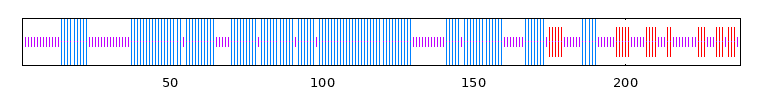 |
| SpHDZ8 | 47.90 | 16.87 | 38.24 | 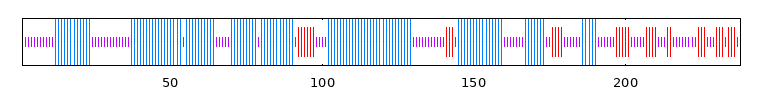 |
| SpHDZ9 | 33.87 | 20.53 | 45.60 | 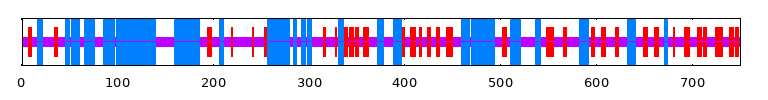 |
| SpHDZ10 | 36.75 | 12.72 | 50.53 | 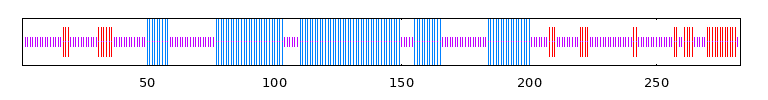 |
| SpHDZ11 | 28.83 | 16.52 | 54.65 | 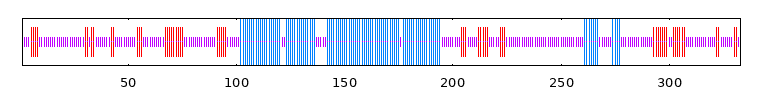 |
| SpHDZ12 | 44.26 | 8.51 | 47.23 | 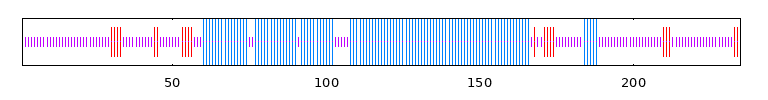 |
| SpHDZ13 | 42.21 | 9.13 | 48.67 | 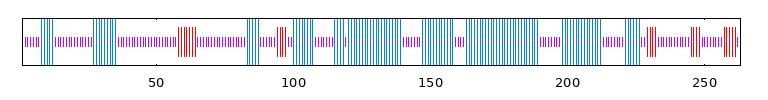 |
| SpHDZ14 | 40.98 | 11.31 | 47.71 | 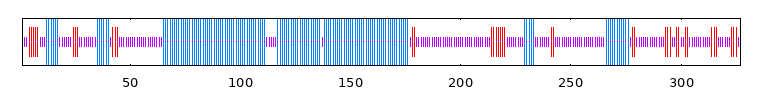 |
| SpHDZ15 | 30.03 | 12.46 | 57.51 | 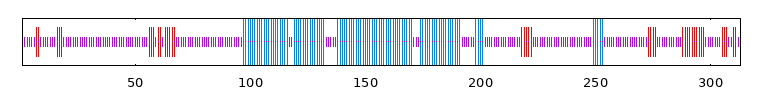 |
| SpHDZ16 | 29.60 | 18.84 | 51.56 | 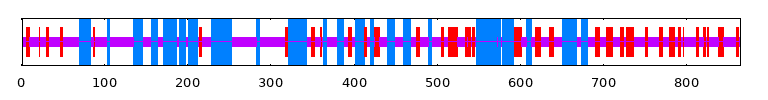 |
| SpHDZ17 | 36.77 | 16.37 | 46.86 | 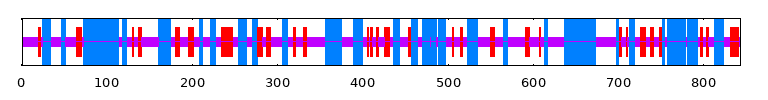 |
| SpHDZ18 | 48.36 | 11.89 | 39.75 | 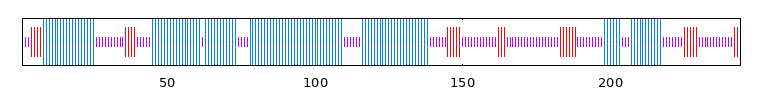 |
| SpHDZ19 | 28.11 | 22.49 | 49.40 | 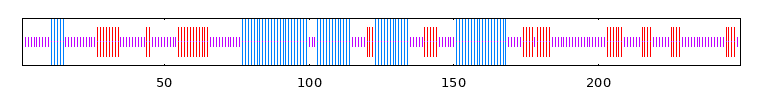 |
| SpHDZ20 | 31.74 | 12.87 | 55.39 | 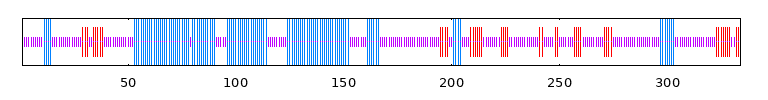 |
| SpHDZ21 | 21.90 | 16.57 | 55.52 | 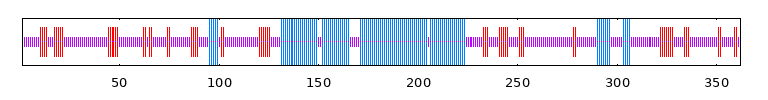 |
| SpHDZ22 | 32.12 | 18.17 | 49.71 | 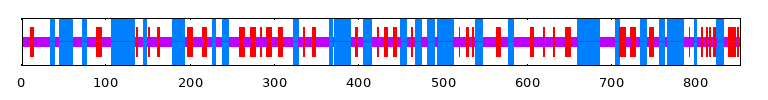 |
| SpHDZ23 | 44.44 | 13.43 | 42.13 | 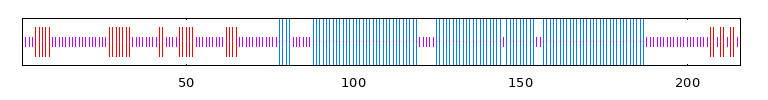 |
| SpHDZ24 | 51.16 | 10.47 | 38.37 | 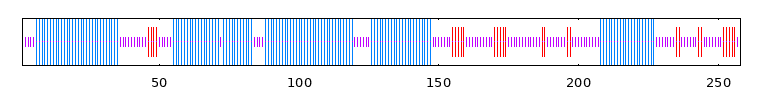 |
| SpHDZ25 | 24.08 | 19.11 | 56.81 | 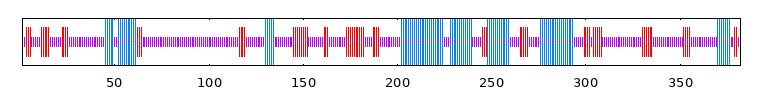 |
| SpHDZ26 | 49.05 | 13.69 | 37.26 | 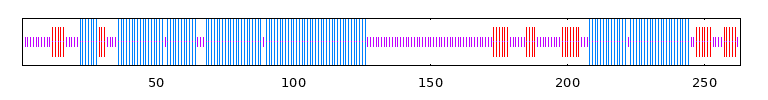 |
| SpHDZ27 | 30.45 | 20.70 | 48.86 | 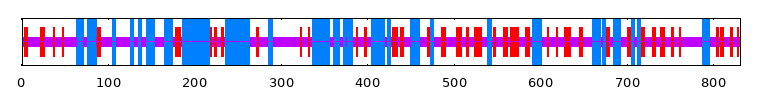 |
| SpHDZ28 | 29.77 | 20.17 | 50.06 | 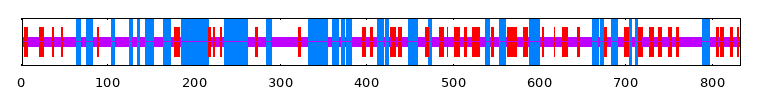 |
| SpHDZ29 | 45.56 | 11.97 | 42.47 | 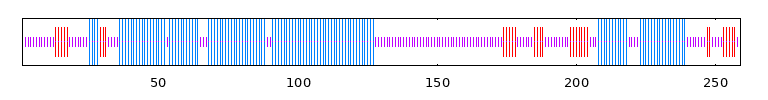 |
| SpHDZ31 | 33.88 | 12.05 | 54.07 | 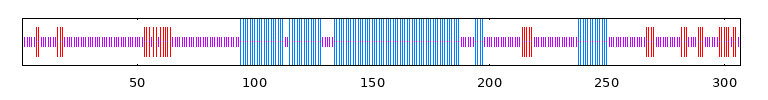 |
| SpHDZ32 | 37.27 | 13.64 | 49.09 | 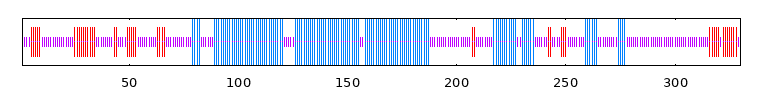 |
| SpHDZ33 | 31.85 | 17.56 | 50.59 | 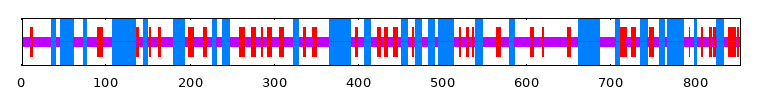 |
| SpHDZ34 | 48.84 | 11.63 | 39.53 | 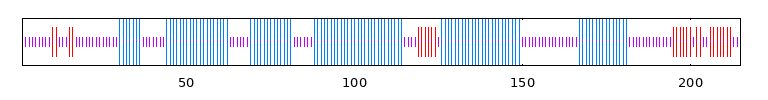 |
| SpHDZ35 | 36.30 | 16.37 | 47.33 | 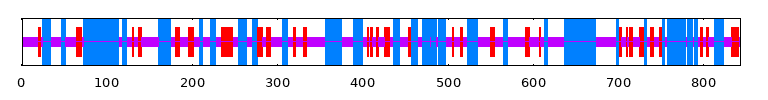 |
| SpHDZ36 | 33.14 | 16.28 | 50.59 | 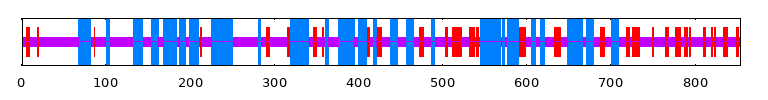 |
| SpHDZ37 | 32.99 | 24.01 | 43.00 | 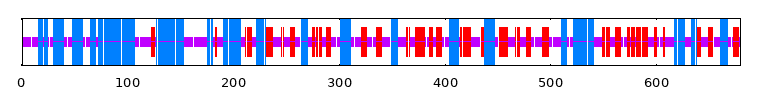 |
| SpHDZ38 | 44.87 | 6.84 | 48.29 | 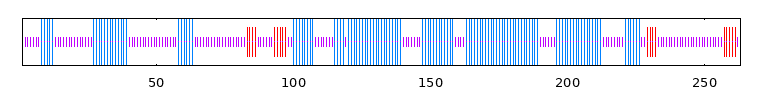 |
| SpHDZ39 | 30.40 | 11.85 | 57.75 | 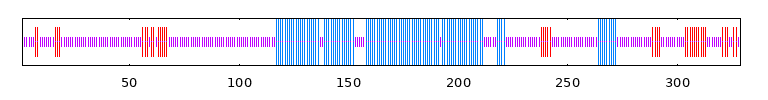 |
| SpHDZ40 | 44.82 | 10.98 | 44.21 | 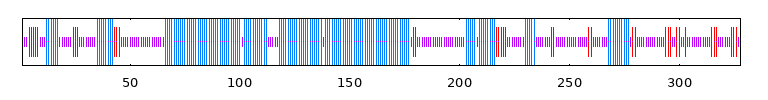 |
| SpHDZ41 | 47.68 | 11.81 | 40.51 | 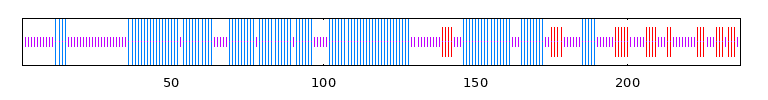 |
| SpHDZ42 | 32.80 | 20.13 | 47.07 | 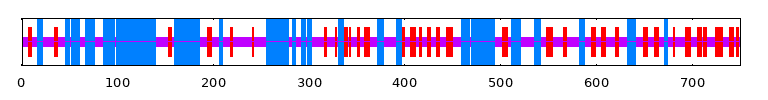 |
| SpHDZ43 | 36.42 | 16.73 | 46.86 | 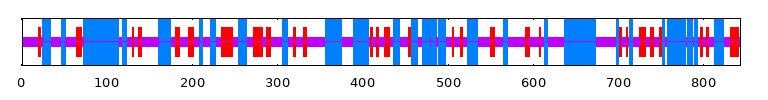 |
| SpHDZ44 | 31.46 | 17.66 | 50.88 | 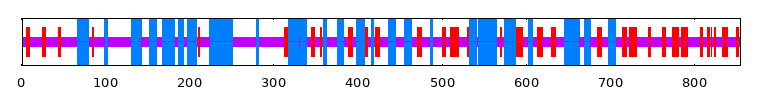 |
| SpHDZ45 | 34.39 | 15.44 | 50.18 | 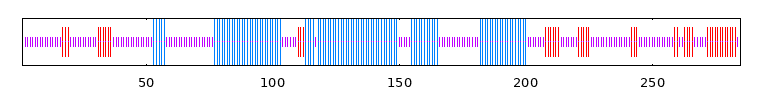 |
| SpHDZ46 | 52.16 | 10.20 | 37.65 | 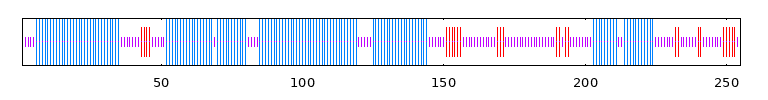 |

**Table S5. Primers used in this study**

| Forward primer | Reverse primer | Description |
| --- | --- | --- |
| CCGGGCACTATTTCCACCAT | AGCCAAGGCCAAAATCCAGT | qRT-PCR for *SpHDZ39* |
| AGGGAGTGATATCGAGCCGT | AAGGCCGAGATCTCTAGCCA | qRT-PCR for *SpHDZ41* |
| TTGGCATCGTTGAGGGTCT | CAGTGGGAACACGGAAAGC | qRT-PCR for *SpGAPDH* |
| GAGAACACGGGGGACTCTAGAATGAGTACTACTTGTACTGG | GCTCACCATGGTACCCCCGGGAACCTTAGTTTTTTTTATCT | Sublocation for *SpHDZ39* |
| GAGAACACGGGGGACTCTAGAATGCAAGGGAGTGATATCGA | GCTCACCATGGTACCCCCGGGAGTCCACGAGTCCCACCAGT | Sublocation for *SpHDZ41* |
| GCCACCTCGCCCAATGGTACCGTAATGATTACTCGCGTAATGATTACTC | TGCGTCCGGCGTAGAGGATCCGAGTAATCATTACGCGAGTAATCATTAC | Cloning MA0573 into pHis2 |
| GCCACCTCGCCCAATGGTACCGTAATAATTACTCGCGTAATAATTACTC | TGCGTCCGGCGTAGAGGATCCGAGTAATTATTACGCGAGTAATTATTAC | Cloning MA0573_mutant into pHis2 |
| GCCACCTCGCCCAATGGTACCCAATTATTCAATTATTCAATTATT | TGCGTCCGGCGTAGAGGATCCAATAATTGAATAATTGAATAATTG | Cloning MA0008 into pHis2 |
| GCCACCTCGCCCAATGGTACCCAAATATTCAAATATTCAAATATT | TGCGTCCGGCGTAGAGGATCCAATATTTGAATATTTGAATATTTG | Cloning MA0008_mutant into pHis2 |
