# Supplementary material for: Ectopic expression of the Sesuvium portulacastrum genes SpHDZ39 and SpHDZ41 enhances cadmium tolerance in Arabidopsis
Source: Research Square preprint supplement (doi:10.21203/rs.3.rs-8285582/v1), 2025-12-11
Supplement: Supplementary file 4 [file 541b2403b83074a80b7bc080.xlsx]

## Sheet: 镉胁迫叶
Gene	CK Leaves1	CK Leaves2	CK Leaves3	7 Leaves1	7 Leaves2	7 Leaves3	14 Leaves1	14 Leaves2	14 Leaves3	21 Leaves1	21 Leaves2	21 Leaves3	CK Root1	CK Root2	CK Root3	7 Root1	7 Root2	7 Root3	14 Root1	14 Root2	14 Root3	21 Root1	21 Root2	21 Root3
SpHDZ1	1346	1227.11	1452.32	1863.63	1817.71	1855.65	1403.77	1300.07	1402.8	1397.89	1296.78	1290.21	1850.2	1637.38	1779.17	3261.82	2902.61	3085.04	2532.74	2450.87	2636.18	2726.88	2638.86	2500.56
SpHDZ2	5540.4	6110.85	6108.34	7334.14	7190.99	7167.52	3923.75	4035.35	3838.67	5409.49	5429.22	5377.99	4287.88	3766.86	4215.85	6254.19	6402.53	5669.85	1979.59	2076.6	1977.29	2333.82	3016.56	3043.24
SpHDZ3	3	0	1	1	8	3	2	1	1	2	2	1	63	172.5	159.76	4	4	2.2	16	18	16	32	24	12
SpHDZ4	87.34	96.01	59.84	65.66	59.28	87.87	113.82	74.87	106.99	94.72	92.61	92.38	483.99	436.97	418.96	344.46	379.97	317.43	573.21	489.05	500.27	311.07	323.78	421.32
SpHDZ5	774.21	1187.5	884.73	1065.06	1053.84	1041.69	1206.99	1221.36	1165.66	1127.77	1111.54	1065.23	67.11	97.69	89.05	36.6	41.69	38.96	54.63	66.23	43.84	57.43	20	38.56
SpHDZ6	146.21	396.17	271.6	156.25	151.01	145	361.31	413.03	383.8	360.04	364.23	363.25	276.4	185	226.06	262.25	267.25	319.49	695.07	728.07	693.08	889.06	917.65	1065.94
SpHDZ7	386.89	560.73	354.54	1597.26	1564.58	1592.54	670	662.86	652.55	783.91	784.95	779.47	231.68	212.97	203.73	1925.95	1949.45	1920.96	327.79	331.26	314.07	211.9	249.64	326.87
SpHDZ8	155.12	309.5	144.87	562.21	634.53	568.16	258.82	274.47	254.33	339.98	335	346.16	147.32	124.21	164.21	844.37	819	799.83	190.52	229.92	186.16	188.78	178.99	233.09
SpHDZ9	29	8.79	17	25	27	13	21.91	19	21	19	19	22	124.63	167.7	118.26	42	40.81	30	50.61	56.98	51	73.31	37.6	26.99
SpHDZ10	746	688	834	416	359	401	558	611	621.86	608	615	594	1425	1287	1533	1164.83	1162.82	1229	1268	1223	1248	1439	1563.88	1405
SpHDZ11	9	2	2	22	21	28	3	5	8	7	8	7	51	131	108	12	18	14	30	26	30	35	36	26
SpHDZ12	0	1	0	0	0	0	0	0	0	0	0	0	0	0	0	0	0	0	0	0	0	0	0	0
SpHDZ13	0	0	0	1	0	1	0	0	0	1	0	0	17.47	14.18	17.87	22.81	16.12	12	25.22	31.44	35.83	34.49	46.53	32
SpHDZ14	420	606	353.32	474.19	454	456.89	706	663	697.86	542.45	547.83	519	578	511.42	516.66	1205.65	990.08	1187.74	1542.28	1486	1564.72	1629.68	992.16	1502.22
SpHDZ15	239.01	80	81.26	89.69	103	103	91	104	95	154.65	145.54	134.81	353.36	467.6	451.68	538	456.18	408.67	154.1	142.89	152.01	159.32	138.63	197
SpHDZ16	45.01	100.42	87.1	246.59	254.78	243.47	131.79	111.4	119.99	128.67	106.87	93.2	2	3	0	1	0	1	5	0	0	0	1	1
SpHDZ17	58.14	21.85	23.99	97.81	77.72	109.83	75.81	89.9	98.02	120.01	109.96	129.34	553.03	564.02	512.19	435.06	399.31	447.61	289.64	292.03	305.51	324.41	319.5	403.31
SpHDZ18	23	34	22	47.84	50	38	14	16	23	30	30	36	71	65	52.29	94.58	96.33	105	23	18.46	18	13	12	12
SpHDZ19	85.99	163.53	102.32	224.25	213.61	184.51	85.17	97.51	114.97	119.99	110.39	129.74	159.59	163.71	161.88	223.46	220.77	186.01	121.94	90.66	98.42	115.99	186.83	122.42
SpHDZ20	4152.6	4189.71	5067.66	4278.43	4211.02	4489.48	3498.25	3518.65	3644.96	4135.14	3970.31	4135.45	4282.09	4047.14	4241.86	4813.54	4862.93	4715.15	2831.41	2768.4	2732.14	3387.18	4517.87	3747.76
SpHDZ21	4	3	3	8	9	8	5	3	6	3	3	5	48	145.5	140.24	27	23	23.8	18	27	38	37	37	19
SpHDZ22	123.75	95.8	142.53	95.93	80.11	97.96	158.33	128.51	133.16	145.41	146.37	185.65	436.2	410.62	342.16	391.06	389.64	359.6	636.12	669.92	630.33	345.14	379.85	458.96
SpHDZ23	6928.01	7475.56	7311.45	3868.34	3767.67	3846.04	4519.62	4706.72	4808.93	5154.58	4979.24	5089.29	7052.96	5810.92	6666.52	5842.03	5560.29	5565.23	6063.23	6105.58	6362.39	6053.69	7343.94	6500.72
SpHDZ24	285.44	249.87	258.37	221.67	174.2	240.64	220.58	227.22	268.41	213.51	214.51	215.41	375.23	383.63	363.68	283.91	275.68	311.34	268.72	286.18	265.54	230.71	228.31	225.88
SpHDZ25	138.31	309.1	196.06	207.58	184.07	195.96	84.29	87.98	91.59	150.82	148.33	134.88	504.25	433.97	444.81	434.01	437.53	372.37	153.02	150.26	147.22	207.82	265.43	210.15
SpHDZ26	318.27	636	442	60	72	73	326.92	323	309.15	336	319.02	365.06	202.13	160	194	153	141	144	390.15	426	369.27	536	632.98	672.22
SpHDZ27	668.05	1287.91	947.61	1456.27	1506.29	1498.69	981.8	985.79	890.29	1074.17	1068.49	1027.85	75	119	90.38	26.19	37	38	50.49	38.36	46.51	63	39	50.56
SpHDZ28	925.74	1520.59	1168.66	1499.67	1479.87	1421.62	1289.21	1266.85	1235.05	1364.06	1273.97	1168.92	118.89	148.31	155.57	71.21	77.31	78.04	79.88	84.4	83.65	72.57	63	62.87
SpHDZ29	1014.79	1592.46	1265.27	355.5	313.54	327.48	1338.51	1262.78	1329.08	1179.03	1179.78	1198.78	1020.98	701.16	929.54	715.15	673.94	722.02	1208.74	1213.93	1226.26	1532.95	1835.96	1920.75
SpHDZ30	7	6	9	4	4	2	9	8	7	7	4	8	121.14	85.82	139.06	88.58	96.01	70	95.28	115.32	122.17	107.51	153.15	132.43
SpHDZ31	135.99	160	81.33	66	53	70	38	30	36	66.98	73.13	67.19	169.08	269.32	218.09	226.67	236.07	234.21	108.25	114.21	119.27	100.1	105	151
SpHDZ32	15768	16339.4	16106.5	11092.7	11077.2	11372.9	12582.4	12633.2	12697.9	12374.3	12106.8	12373.6	15907.8	13511.1	14586.4	14505	13464.7	13545.8	13287.8	13285.4	13411.6	13243.3	15353.1	13169.3
SpHDZ33	80.92	92.19	70.64	113.41	86.61	94.17	144.85	138.62	111.85	169.88	144.02	202.98	770.81	808.42	693.87	576.48	590.39	570.96	471.68	433.02	436.4	366.79	333.38	426.72
SpHDZ34	1	26	4	11	17	13	11	4	10	9	16	21	398	362	368	300	340	366	248	272	260	243.05	232	220
SpHDZ35	24	28	20	337.46	340.91	378.29	107.94	105.46	113.79	106.03	118.32	126.51	585.53	597.2	505.08	635.74	643.71	581.17	375.06	383.21	373.11	423.44	450.85	526.67
SpHDZ36	34.59	101	63	130	147	130	97	87	83	73	83	64	0	1	3	2	0	0	1	1	0	1	0	0
SpHDZ37	40	66.04	41.33	37	37.26	53.4	41.01	43	45.59	52.66	66.99	46.32	245.51	241.09	261.17	122.44	127.14	134.68	87.16	89.12	97.84	90.75	70.36	64.86
SpHDZ38	1	0	0	2	2	3	1	1	1	0	0	2	114.39	121	133.07	117.62	121.87	110	179.5	180.24	176	166	226.32	146.57
SpHDZ39	183	90	57.41	172.31	210	189	81	83	77	91.37	93.34	132	569.56	617.07	599.22	1051.33	1061.75	978.12	275.64	308.9	324.72	293.58	303.37	400
SpHDZ40	148	185	92.09	144.08	165	164.37	117.1	143	103.59	125.27	95.27	113.24	224	183.58	197.34	329.1	306.24	363.41	195.67	179	184.28	276.43	196.26	262.16
SpHDZ41	87.99	149.77	87.59	475.53	447.89	429.29	114.18	141.68	122.12	177.11	178.05	144.36	52	52.82	64.06	507.67	546.55	427.22	63.69	65.82	73.77	37.32	44.37	57.03
SpHDZ42	1	0	0	1	0	0	0	0	1	0	1	0	37	73.47	46	4	12	8	22	16	17	20	10	7.01
SpHDZ43	45.86	20.15	20.01	129.73	97.36	124.88	118.25	124.64	134.19	119.97	136.71	127.15	724.44	765.77	679.73	703.19	737.98	668.21	325.29	332.76	340.38	387.15	386.65	427.03
SpHDZ44	25.4	37.58	29.9	65.41	57.22	60.53	41.2	43.6	62.01	51.33	48.13	34.8	1	2	0	0	1	1	0	2	0	0	0	0
SpHDZ45	181	268	237	85	93	102	86	58	103.14	93	95	114	280	238	257	289.17	302.18	321	168	211	183	222	240.12	269
SpHDZ46	9	2	9	9.16	3	9	6	3	3	4	4	6	70	62	60	69.42	62.3	65	14	22.54	18	14	7	14
