# Supplementary material for: Ectopic expression of the Sesuvium portulacastrum genes SpHDZ39 and SpHDZ41 enhances cadmium tolerance in Arabidopsis
Source: Research Square preprint supplement (doi:10.21203/rs.3.rs-8285582/v1), 2025-12-11
Supplement: Supplementary file 5 [file c139181b25f5b0fb0553c438.xlsx]

## Sheet: Sheet1
Gene	CK Leaves1	CK Leaves2	CK Leaves3	50 Leaves1	50 Leaves2	50 Leaves3	100 Leaves1	100 Leaves2	100 Leaves3	200 Leaves1	200 Leaves2	200 Leaves3	CK Root1	CK Root2	CK Root3	50 Root1	50 Root2	50 Root3	100 Root1	100 Root2	100 Root3	200 Root1	200 Root2	200 Root3
SpHDZ1	24.11	27.38	26.17	21.6	23.13	24.8	27.82	25.79	29.99	24.28	25.87	26.88	53.53	53.64	50.82	42.64	44.58	50	48.59	46.75	47.23	37.5	43.38	39.18
SpHDZ2	62.97	56.89	58.3	33.46	35.89	35.76	40.15	37.55	39.54	33.52	32.64	33.88	72.05	70.65	71.62	75.06	72.73	69.14	67.32	64.7	65.9	74.56	76.41	72.27
SpHDZ3	0	0.05	0	0	0	0	0	0.03	0	0	0	0	1.53	1.98	1.65	0.19	0.11	0.11	0.08	0.3	0.27	0.11	0.13	0.11
SpHDZ4	1.53	1.41	1.63	0.95	1.2	1.12	1.01	0.79	1.07	1.05	1.24	0.9	7.03	7.54	7.03	11.99	12.84	13.92	11.81	11.84	10.75	12.92	13.31	12.75
SpHDZ5	9.81	10.65	10.33	10.64	11.21	10.59	11.35	9.81	11.86	11.32	11.61	11.69	0.68	0.65	0.79	0.78	0.84	0.84	0.69	0.64	0.59	0.67	0.71	0.51
SpHDZ6	2.89	2.66	2.31	31.38	32.94	34.11	35.57	35.16	36.57	45.73	49.59	50.16	5.54	6.63	6.48	34.14	29.5	30.85	34.91	35.71	36.78	37.97	38.81	38.97
SpHDZ7	14.06	12.11	13.84	42.07	40.25	43.31	47.6	49.84	45.31	53.24	49.56	54.47	9.29	8.23	8.86	21.96	24.45	23.35	79.97	83.3	86.61	37.99	40.01	40.44
SpHDZ8	6.35	5.27	4.72	25.94	21.47	24.19	29.27	30.48	27.72	32.37	30.92	30.28	6.61	5.78	4.41	19.47	18.42	17.07	58.28	53.71	58.08	29.03	29.13	29.18
SpHDZ9	0.39	0.37	0.29	0.18	0.22	0.2	0.26	0.19	0.17	0.31	0.29	0.26	1.28	1.1	1.05	0.55	0.6	0.47	0.48	0.44	0.42	0.5	0.54	0.34
SpHDZ10	14.48	14.48	15.31	16.84	16.65	16.21	16.41	17.02	17.38	14.38	15	14.08	50.8	48.39	49.65	39.73	39.18	34.9	35.89	35.28	36.77	36.91	35.3	34.93
SpHDZ11	0.25	0.17	0.39	0.03	0.03	0	0.08	0.05	0.06	0	0.03	0	1.87	1.33	1.53	0.14	0.09	0.09	0.24	0.12	0.24	0	0.06	0
SpHDZ12	0	0	0	0.05	0.1	0.05	0	0	0	0	0.05	0	0	0	0	0	0	0	0	0	0	0	0	0
SpHDZ13	0	0	0	0	0	0	0	0.04	0	0	0	0	1.3	0.82	0.91	1.79	1.86	1.86	1.74	1.9	0.96	1.61	1.75	1.48
SpHDZ14	5.61	4.86	5.7	22.15	21.24	22.82	32.46	31.66	32.93	28.99	29.42	28.61	12.2	13.53	12.73	42.59	41.04	38.96	51.49	50.7	51.08	40.37	39.9	40.99
SpHDZ15	2.3	2.47	2	1.78	1.52	1.65	1.12	1.43	1.59	1.53	1.08	1.35	8.33	7.33	8.29	10.35	9.36	9.37	8.49	7.99	9.22	8.07	8.2	8.2
SpHDZ16	1.11	1.38	1.22	0.77	0.75	0.94	0.74	0.78	0.77	0.76	1.01	0.76	0.02	0	0.02	0.03	0.03	0.04	0.01	0.01	0.01	0	0.01	0.01
SpHDZ17	0.93	1.11	0.83	0.99	1.04	1.33	0.74	1	1.08	1.15	1.57	1.22	8.87	8.65	8.68	13.03	13.14	13.54	12.55	12.15	10.8	13.16	13.32	12.39
SpHDZ18	0.91	0.5	0.51	0.88	1.34	0.78	1.12	0.91	0.95	0.95	0.89	1.06	3.22	3.99	3.92	6.18	7.07	6.07	6.46	6.21	7.03	8.13	7.53	8.37
SpHDZ19	2.82	2.66	2.6	3.02	2.6	2.84	2.43	2.42	2.25	2.78	2.76	2.75	4.51	3.96	4.51	2.9	3.31	3.16	3.03	3.32	3.63	2.63	2.79	2.41
SpHDZ20	58.17	51.54	56.23	47.97	48.91	48.04	58.23	55.06	52.72	47.4	43.59	47.72	104.83	103.25	105.17	100.83	98.72	95.73	81.83	77.21	80.62	98.63	101.8	99.72
SpHDZ21	0.22	0.19	0.1	0.06	0	0	0.03	0	0.03	0	0	0.06	1.62	1.81	1.97	0.03	0.07	0.1	0.14	0.27	0.31	0.13	0.07	0.07
SpHDZ22	1.98	2.15	2.03	1.2	1.46	1.34	0.92	1.02	0.98	1.07	1.19	1.11	4.66	4.32	4.73	8.53	9.95	9.69	8.02	8.83	8.29	9.05	9.24	8.58
SpHDZ23	172.17	160.7	166.17	180.37	200.11	182.45	177.06	158.25	169.32	150.84	152.37	153.14	196.95	190.33	191.16	169.39	155.93	152.51	157.09	149.82	154.08	143.85	145.69	137.99
SpHDZ24	3.29	3.23	3.83	5.84	4.52	5.28	5.18	5.11	4.66	4.51	3.45	3.47	6.35	6.69	6.25	10.09	10.42	9.76	9.17	9.81	9.75	11.15	10.88	10.25
SpHDZ25	1.95	2.42	1.98	2.25	2.26	1.85	1.45	1.59	1.57	1.63	1.32	1.4	11.94	11.31	11.64	5.9	5.81	5.73	6.43	6.3	6.26	5.24	5.1	5.4
SpHDZ26	1.93	1.81	1.8	19.65	19.54	20.03	21.3	21.62	22.33	21.31	23.17	22.86	2.41	3.09	2.56	15.06	14.28	13.74	22.78	25.55	26.9	20.27	21.74	19.28
SpHDZ27	8.9	9.21	9.8	9.78	9.51	9.22	9.06	8.14	9.26	9.21	9.72	9.17	0.67	0.55	0.62	0.58	0.48	0.56	0.55	0.72	0.46	0.48	0.41	0.41
SpHDZ28	13.53	13.88	13.69	12.08	13.86	12.99	12.59	10.93	13.34	13.45	14.18	14.06	1.21	1.35	1.19	1.14	1.25	1.6	1.16	1.14	1.05	1.01	1.1	1.08
SpHDZ29	2.62	2.45	2.71	21.92	20.25	22.29	24.46	25.28	25	27.03	27.09	26.69	8.68	8.51	8.09	33.81	30.29	29.18	42.51	43.6	43.53	40.04	37.55	40.42
SpHDZ30	0.13	0.05	0.13	0.27	0.08	0.19	0.24	0.13	0.19	0.16	0.29	0.08	4.29	3.74	3.66	3.49	3.78	3.87	4.58	4.08	4.47	3.69	2.74	3.06
SpHDZ31	0.84	0.66	0.94	0.52	0.73	0.67	0.38	0.46	0.44	0.36	0.31	0.47	2.25	2.24	2.26	2.34	2.29	2.09	2.08	1.9	1.79	1.79	1.62	1.94
SpHDZ32	221	217.62	222.09	243.97	253.57	253.45	241.45	223.72	238.37	218.51	227.37	231.09	335.78	329.3	326.82	285.85	272.66	263.71	282.63	278.64	277.55	280.51	275.93	270.37
SpHDZ33	1.82	1.75	1.89	1.66	1.46	1.59	1.26	1.12	1.32	1.62	1.33	1.44	14.34	13.95	14.06	13.51	14.34	14.71	12.79	13.32	12.69	14.36	14.79	12.67
SpHDZ34	0.13	0.17	0.13	1.3	0.99	1.46	0.74	0.77	0.65	0.83	0.44	0.78	38.62	36.76	40.33	17.49	20.14	16.7	15.72	16.14	15.44	17.05	15.81	14.39
SpHDZ35	0.8	0.9	0.84	1.08	0.99	1.28	1.01	1.12	1.04	1.36	1.41	1.11	9.44	8.83	8.97	14.83	15.36	16.07	16.15	14.7	14.43	15.9	15.3	13.86
SpHDZ36	1.03	0.86	1.16	0.57	0.76	0.88	0.44	0.72	0.75	0.68	0.64	0.9	0.01	0.01	0.01	0.02	0.02	0.01	0.01	0.01	0	0.04	0.01	0.01
SpHDZ37	0.67	0.4	0.46	0.55	0.95	0.9	0.76	0.58	0.58	0.53	0.8	0.62	3.69	3.93	3.61	1.03	1.06	1.14	1.11	1	0.8	0.87	0.79	0.76
SpHDZ38	0	0	0.03	0.16	0.07	0.07	0.07	0	0.1	0.1	0.1	0.07	6.01	6.26	4.76	4.9	5.35	4.68	4.65	4.9	5.72	6.37	5.87	4.73
SpHDZ39	2.02	1.87	1.97	1.39	1.38	1.71	1.11	1	0.77	0.67	0.95	0.98	15.91	15.03	14.16	8.57	8.84	7.99	6.36	6.79	6.92	7.25	7.33	7.54
SpHDZ40	1.65	1.63	1.54	4.94	4.95	4.68	7.5	8.05	8.3	6.66	5.49	5.58	5.93	5.33	4.51	15.69	14.68	14.97	15.89	16.27	17.39	16.13	14.28	14.75
SpHDZ41	2.33	1.89	2.04	10.87	9.72	10.81	11.91	11.48	12	14.95	14.39	14.23	2.12	1.69	1.55	5.39	5.55	5.07	24.88	22.14	25.21	7.69	8.32	8.51
SpHDZ42	0	0	0.01	0.01	0.03	0.01	0	0.01	0	0.01	0	0	0.66	0.55	0.46	0.12	0.26	0.15	0.14	0.27	0.19	0.19	0.12	0.16
SpHDZ43	1.02	1.21	1.35	1	0.86	1.17	1.05	0.92	0.9	1.32	1.36	1.21	12.01	10.92	11.44	12.42	12	12.65	12.99	13.2	12.27	12.73	13.34	12.48
SpHDZ44	0.43	0.32	0.48	0.26	0.21	0.4	0.4	0.24	0.27	0.34	0.32	0.25	0.04	0	0	0.04	0.03	0.01	0.03	0.06	0.01	0.03	0.04	0.06
SpHDZ45	2.4	2.36	2.3	2.65	2.45	2.5	2.28	2.35	2.43	1.95	2.18	1.92	10.13	9.02	10.14	7.6	7.68	7.37	7.4	7.18	7.28	7.47	7.86	8.99
SpHDZ46	0.17	0.13	0.17	0.27	0.21	0.21	0.24	0.17	0.07	0.14	0.17	0.1	1.85	2.14	2.07	8.32	8.92	8.32	7.45	6.63	7.4	8.57	8.34	8.96
